# Supplementary material for: Carnitine Palmitoyltransferase 1 Regulates Prostate Cancer Growth under Hypoxia
Source: MDPI journal article supplement (doi:10.3390/cancers13246302), 2021-12-15
Supplement: s1 [file s1]

## Carnitine Palmitoyltransferase 1 Regulates Prostate Cancer Growth under Hypoxia

Leslimar Rios-Colon, Pawan Kumar, Susy Kim, Mitu Sharma, Yixin Su, Ashish Kumar, Sangeeta Singh, Nalexus Stocks, Liang Liu, Molishree Joshi, Isabel R. Schlaepfer, Deepak Kumar and Gagan Deep

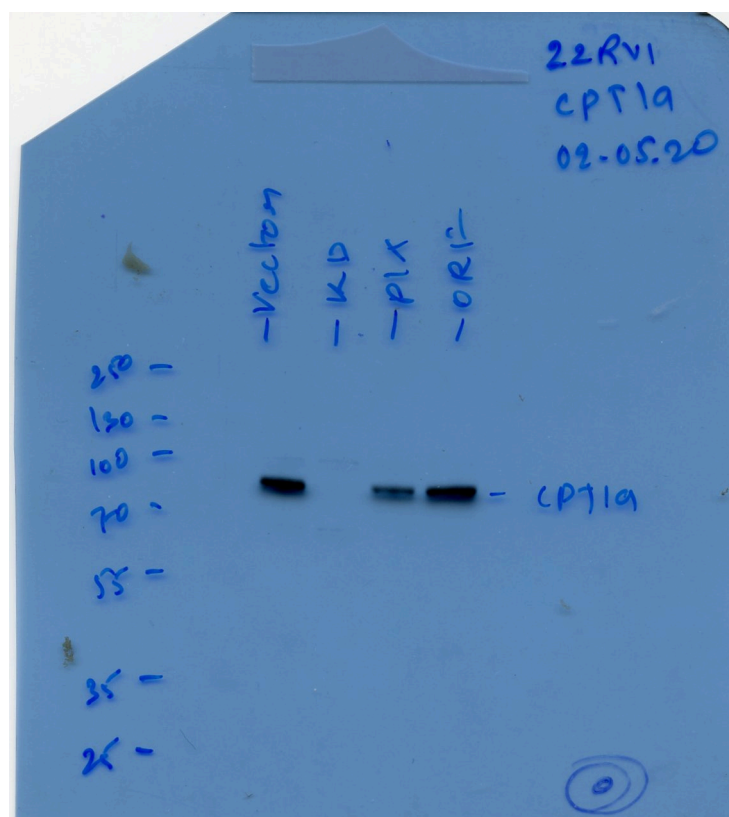

22Rv1 cells(VC,KD, PLX and ORF)- CPT1A  
Data shown in Figure 1A, left panel

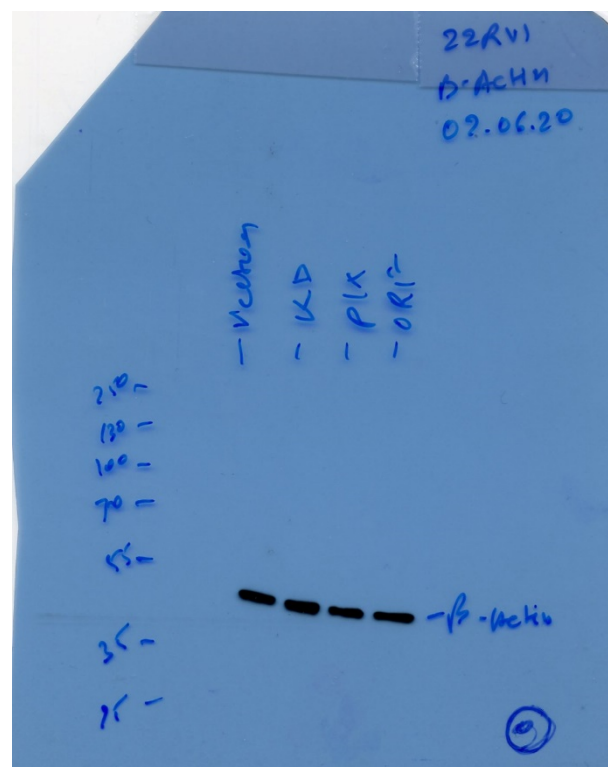

22Rv1 cells(VC,KD, PLX and ORF)-  $\beta$ -actin  
Data shown in Figure 1A- left panel

**Figure S1:** Full blots for Figure 1A- left panel.

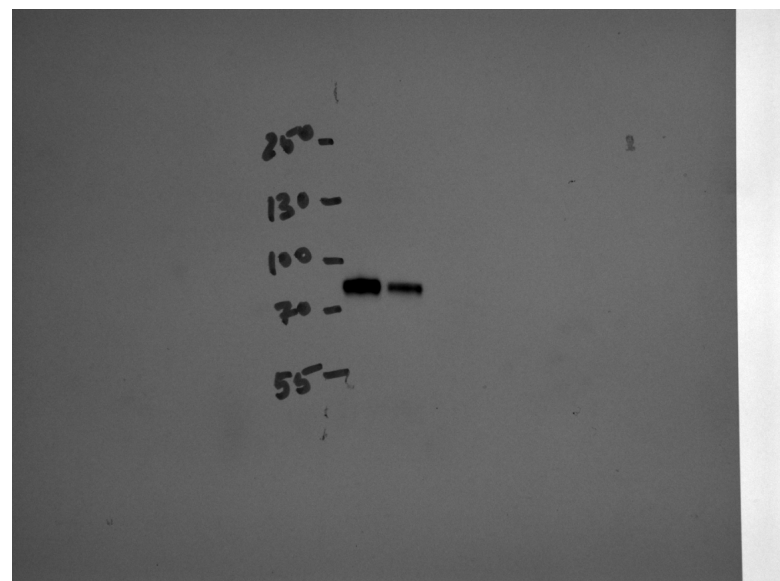

MDA-PCa-2b cells (VC and KD)- CPT1A  
Data shown in Figure 1A- right panel

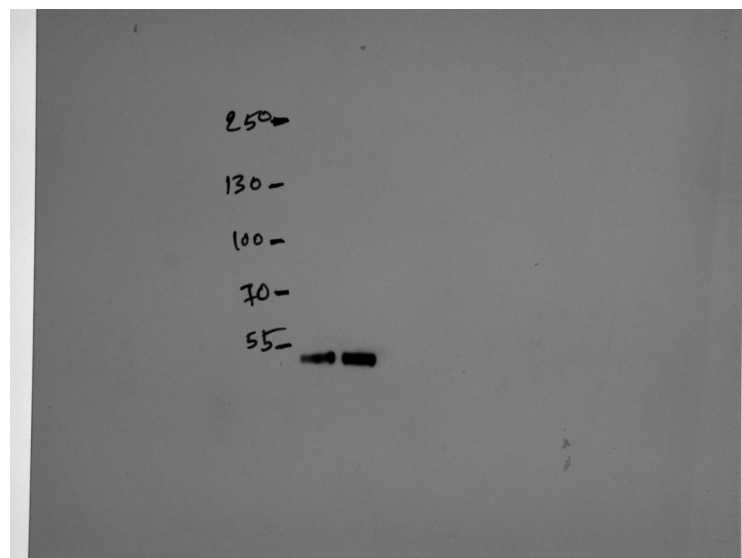

MDA-PCa-2b cells(VC and KD)- α tubulin  
Data shown in Figure 1A- right panel

**Figure S2.** Full blots for Figure 1A- right panel.

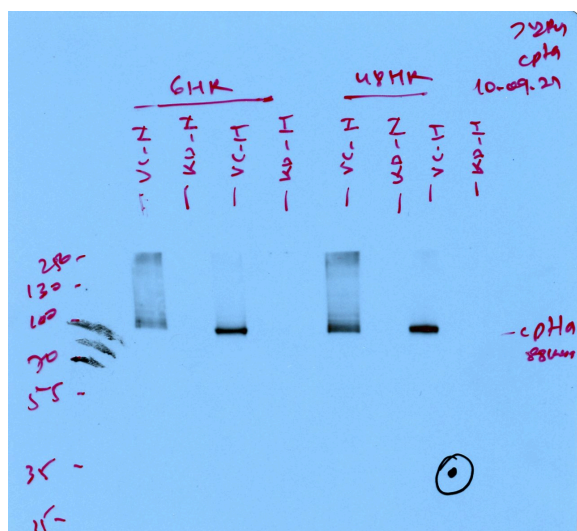

22Rv1 cells(VC and KD)- CPT1A  
Data shown in Figure 1B

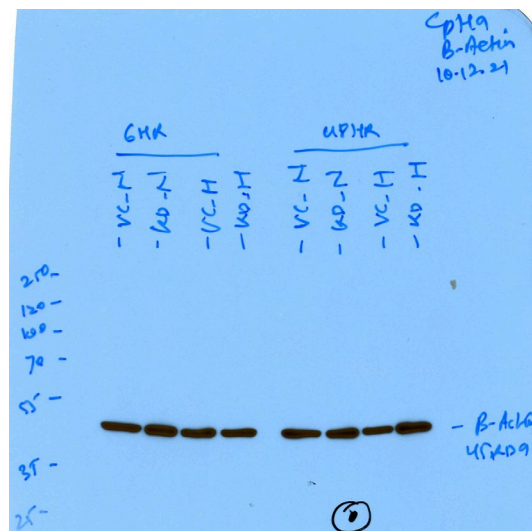

22Rv1 cells(VC and KD)- β-actin  
Data shown in Figure 1B

**Figure S3.** Full blots for Figure 1B.

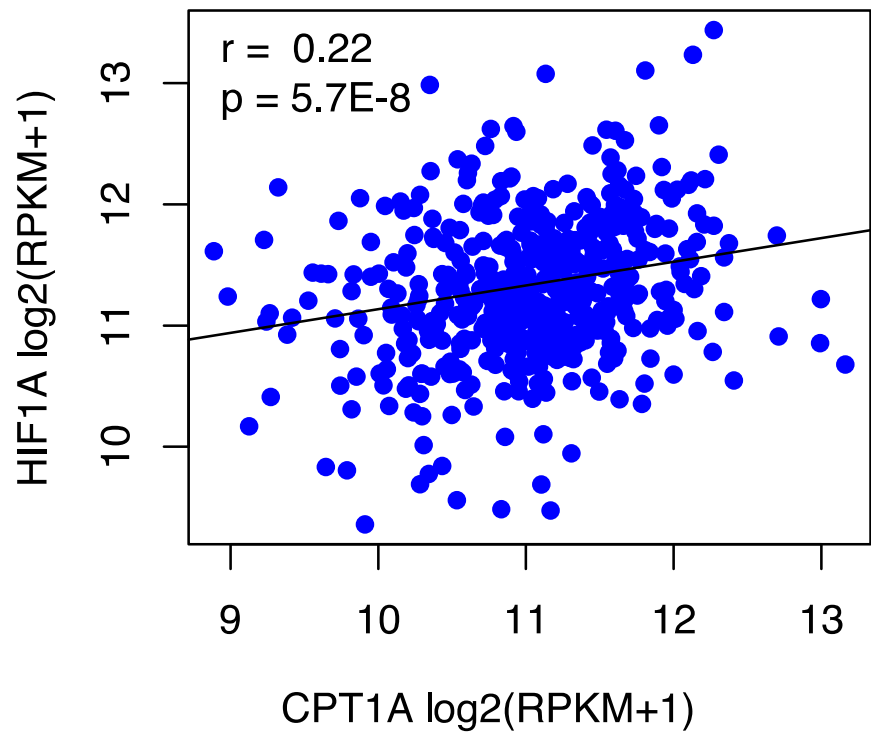

**Figure S4.** Correlation between CPT1A and HIF1A expression in the TCGA PRAD cohort.
